# Supplementary material
Source: PubMed Central journal article supplement (PMC4530407)
Supplement: Supp_Data.pdf [file Supp_Data.pdf]

## Supplementary Data

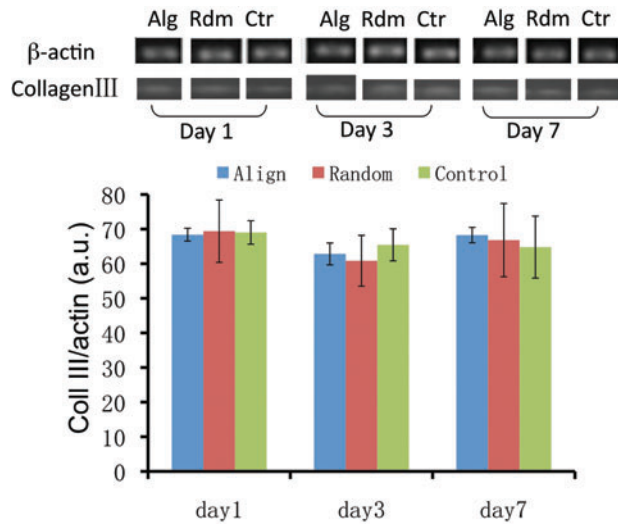

**SUPPLEMENTARY FIG. S1.** Collagen III gene expression of hASCs cultured on random (Rdm) and aligned (Alg) nanofiber meshes and glass coverslips (Ctr).
